# Supplementary material for: The Risk of Osteoporosis and Osteoporotic Fracture Following the Use of Irritable Bowel Syndrome Medical Treatment: An Analysis Using the OMOP CDM Database
Source: MDPI journal article supplement (doi:10.3390/jcm10092044), 2021-05-10

Supplement 1. Exclusion criteria for cohort entry.

| Category                                                                        | Name                                  | Concept id                                                                                                                                                                                                                                                                                                                                                                                                                                                                                                                                                                                                                                                                                                                                                                                |
|---------------------------------------------------------------------------------|---------------------------------------|-------------------------------------------------------------------------------------------------------------------------------------------------------------------------------------------------------------------------------------------------------------------------------------------------------------------------------------------------------------------------------------------------------------------------------------------------------------------------------------------------------------------------------------------------------------------------------------------------------------------------------------------------------------------------------------------------------------------------------------------------------------------------------------------|
| <b>(1) Patients who had a history of abdominal and gastrointestinal disease</b> |                                       |                                                                                                                                                                                                                                                                                                                                                                                                                                                                                                                                                                                                                                                                                                                                                                                           |
| Neoplastic disease                                                              | GI tract malignancy                   | 44501490, 44500731, 44500936, 44499810, 44500363, 44502945, 37018669, 4241792, 4112604, 4243739, 4243114, 4243742, 4243745, 75512, 4241773, 196064, 4241774, 4243878, 4244495, 4243882, 424312, 4244496, 192291, 4244498, 4244501, 4112608, 4244641, 4245560, 4241890, 75210, 4093956, 4244647, 4093955, 200974, 4241922, 36554172, 36683531, 40491001, 443568, 435754, 4095320, 4180790, 411623, 443398, 4092061, 443390, 443381, 443387, 4317409, 40492458, 4313503, 442164, 4313517, 436080, 442141, 4317816, 201529, 4232106, 79740, 25748, 197227, 438090, 199747, 80045, 4247719, 193422, 432837, 19, 7500, 441800, 435752, 26638, 4179720, 195482, 4246125, 438699, 74582, 436635, 192836, 196044, 760999, 4247962, 4312022, 200348, 198371, 36539765, 36548501, 4112603, 36536268 |
|                                                                                 | malignant neoplasm of abdomen         | 4242677, 4242678, 4242683, 45765705, 4243879, 4243125, 4096500, 4241788, 4243887, 192292, 4245553, 4241795, 4241911, 43021774, 197506, 4246127, 443392, 4181328, 4181327, 4180793, 4313511, 36684472, 194589, 40486896, 197806, 197804, 40490929, 201519, 199754, 198091, 4312301, 192568, 198700, 44806773, 4315805, 4315806, 196925, 4314361                                                                                                                                                                                                                                                                                                                                                                                                                                            |
|                                                                                 | malignant neoplasm of pelvis          | 4243741, 201238, 201240, 4313916                                                                                                                                                                                                                                                                                                                                                                                                                                                                                                                                                                                                                                                                                                                                                          |
|                                                                                 | malignant neoplasm of endocrine gland | 133420, 193144, 4311878                                                                                                                                                                                                                                                                                                                                                                                                                                                                                                                                                                                                                                                                                                                                                                   |
|                                                                                 | malignant neoplasm of bone marrow     | 4247726                                                                                                                                                                                                                                                                                                                                                                                                                                                                                                                                                                                                                                                                                                                                                                                   |
|                                                                                 | Non-Hodgkin's lymphoma                | 4038838                                                                                                                                                                                                                                                                                                                                                                                                                                                                                                                                                                                                                                                                                                                                                                                   |
|                                                                                 | malignant lymphoma                    | 432571                                                                                                                                                                                                                                                                                                                                                                                                                                                                                                                                                                                                                                                                                                                                                                                    |
|                                                                                 | inflammatory disease                  | ulcerative colitis 81893                                                                                                                                                                                                                                                                                                                                                                                                                                                                                                                                                                                                                                                                                                                                                                  |
|                                                                                 |                                       | microscopic colitis 4340799                                                                                                                                                                                                                                                                                                                                                                                                                                                                                                                                                                                                                                                                                                                                                               |
|                                                                                 |                                       | crohn's disease 201606, 4190185, 4043371                                                                                                                                                                                                                                                                                                                                                                                                                                                                                                                                                                                                                                                                                                                                                  |
| etc.                                                                            | chronic digestive system disorder     | 4134593                                                                                                                                                                                                                                                                                                                                                                                                                                                                                                                                                                                                                                                                                                                                                                                   |
|                                                                                 | celiac disease                        | 4056336, 4241413, 40482828, 194992                                                                                                                                                                                                                                                                                                                                                                                                                                                                                                                                                                                                                                                                                                                                                        |
| <b>(2) Patients who had a medication that can cause osteoporosis</b>            |                                       |                                                                                                                                                                                                                                                                                                                                                                                                                                                                                                                                                                                                                                                                                                                                                                                           |
| steroid                                                                         | dexamethasone                         | 42922451, 42922453, 42948533                                                                                                                                                                                                                                                                                                                                                                                                                                                                                                                                                                                                                                                                                                                                                              |

|                       |                    |                                                                                                    |
|-----------------------|--------------------|----------------------------------------------------------------------------------------------------|
| anticancer drug       | triamcinolone      | 42922375, 42922376, 42941640                                                                       |
|                       | Hydrocortisone     | 42939642, 42939646, 42939639, 42939631                                                             |
|                       | methylprednisolone | 42934728, 42934742                                                                                 |
|                       | prednisolone       | 42970566                                                                                           |
|                       | docetaxel          | 42922765, 4292231, 41336612, 42921791, 42921543, 41350773                                          |
|                       | vincristine        | 42922339, 42921888, 42939713                                                                       |
|                       | busulfan           | 42920661                                                                                           |
|                       | cytarabine         | 42920696, 42920697, 42922069, 42920345                                                             |
|                       | doxorubicin        | 41361791, 35783409, 35780897, 42946862, 42946876                                                   |
|                       | vinblastine        | 42920569                                                                                           |
|                       | irinotecan         | 42920702, 42920500, 42922070, 42922073, 42921304, 42921307                                         |
|                       | oxaliplatin        | 42920581, 42920587, 42920586, 42920230, 42920236, 42920235, 42920059                               |
|                       | cisplatin          | 42919355, 42920324                                                                                 |
|                       | paclitaxel         | 42920451, 42920133, 42921130, 41358385, 42919743, 42919744                                         |
|                       | etoposide          | 42921410, 42956904                                                                                 |
|                       | asparaginase       | 43268981                                                                                           |
|                       | bleomycin          | 42929924                                                                                           |
|                       | cyclophosphamide   | 1310317, 42944032                                                                                  |
|                       | ifosfamide         | 43294087                                                                                           |
|                       | methotrexate       | 1305058                                                                                            |
|                       | mitomycin          | 21083803, 21034662                                                                                 |
|                       | topotecan          | 42941593                                                                                           |
|                       | anastrozole        | 1348265, 42970739, 1348266                                                                         |
|                       | exemestane         | 1398399, 1398400                                                                                   |
|                       | letrozole          | 1315946, 1315949, 19022830, 1315947, 42948631, 40058597                                            |
|                       | mercaptopurine     | 42963844                                                                                           |
| proton pump inhibitor | esomeprazole       | 42967955, 42968069, 42968036, 41127461, 42968049, 42968161, 42968264, 42968232, 40940024, 42968244 |

|                     |               |                                                                                |
|---------------------|---------------|--------------------------------------------------------------------------------|
| anticonvulsant drug | omeprazole    | 42945767, 42945673                                                             |
|                     | ilaprazole    | 42961064                                                                       |
|                     | lansoprazole  | 42946137, 42946132, 42946175, 42946164, 42946160, 42946163                     |
|                     | pantoprazole  | 42929305, 36891946, 43273164, 42929253, 42929258, 42929251, 42970566           |
|                     | rabeprazole   | 36886127, 42933802, 42933851, 36882275, 42933642, 42933691                     |
|                     | phenobarbital | 42922491, 42956846                                                             |
|                     | fosphenytoin  | 42920607, 42921865                                                             |
|                     | carbamazepine | 42919362, 42946835, 42946833, 42946842                                         |
|                     | oxcarbazepine | 42919272                                                                       |
|                     | valproate     | 42919003, 42931710, 42931721, 42931727, 42931728, 42931742, 42931743           |
| antiviral drug      | levetiracetam | 42918821, 42921116, 42935659, 42935670, 42935693, 42935695, 42935723, 42935727 |
|                     | phenytoin     | 42921163, 42941522                                                             |
|                     | ethosuximide  | 42947177                                                                       |
|                     | gabapentin    | 42957715, 42957692, 42957703, 42957759, 42957784, 42957674                     |
|                     | pregabalin    | 42934200, 42934498                                                             |
|                     | topiramate    | 42945090, 43274162, 42945058, 42945055, 43295762                               |
|                     | cobicistat    | 35605556, 21119805                                                             |
|                     | tenofovir     | 42708097, 1710312, 35605546, 1718509, 1710281                                  |
|                     | elvitegravir  | 42874212                                                                       |
|                     | emtricitabine | 1703093, 35604229, 36268197                                                    |
| GnRH agonist        | gonadorelin   | 42922413                                                                       |
|                     | triptorelin   | 42922329, 42936716                                                             |
| antidiabetic drug   | metformin     | 42968754                                                                       |
|                     | alogliptin    | 42970728                                                                       |
| etc                 | heparin       | 42921076, 42920200, 42921073                                                   |
|                     | warfarin      | 42972020, 42972019, 42972015, 42972014                                         |
|                     | acetazolamide | 42963838                                                                       |

|               |                                                  |
|---------------|--------------------------------------------------|
| levothyroxine | 42956258, 42956280, 42956272, 42956264, 42956268 |
| clonazepam    | 42944760                                         |
| furosemide    | 43861148, 42971383                               |

**(3) Patients who had a history that can cause osteoporosis.**

|                    |                                                 |                                                                                                                                                                                                                                                        |
|--------------------|-------------------------------------------------|--------------------------------------------------------------------------------------------------------------------------------------------------------------------------------------------------------------------------------------------------------|
| neoplastic disease | leukemia                                        | 138708, 134305, 135768, 40481524, 140352, 140057, 136056, 134603, 138099, 4038845, 40482847, 317510, 321526, 140666, 133154, 4001331, 135499, 44783718                                                                                                 |
|                    | lymphoma                                        | 4184976, 434592, 4041800, 40486171, 4003830, 432574, 4001328, 4002356, 4003180, 4212994, 4299152, 4147411, 4003833, 4001329, 4002357, 4038841, 432571, 4094544, 440058, 200349, 40481901, 194878, 4038838, 434881, 4294435, 4266805, 40481522, 4301666 |
| endocrine disease  | neoplasm of breast, ovary, prostate, and uterus | 4162253, 200051, 200962, 45770892                                                                                                                                                                                                                      |
|                    | multiple myeloma                                | 437233                                                                                                                                                                                                                                                 |
|                    | thyroid disease                                 | 4129364, 133729, 138387                                                                                                                                                                                                                                |
|                    | diabetic mellitus                               | 201820, 4063043                                                                                                                                                                                                                                        |
|                    | hyperprolactinemia                              | 4030186                                                                                                                                                                                                                                                |
|                    | hypopituitarism                                 | 4254542                                                                                                                                                                                                                                                |
|                    | iatrogenic cushing's disease                    | 4186577                                                                                                                                                                                                                                                |
| autoimmune disease | hyperparathyroidism                             | 136934                                                                                                                                                                                                                                                 |
|                    | ankylosing spondylitis                          | 437082                                                                                                                                                                                                                                                 |
|                    | rheumatoid arthritis                            | 72714, 4253901, 72705, 80809, 4083556, 4035611                                                                                                                                                                                                         |
|                    | systemic lupus erythematosus                    | 257628                                                                                                                                                                                                                                                 |
| inherited disease  | kleinfelter's syndrome                          | 4228490                                                                                                                                                                                                                                                |
|                    | thalassemia                                     | 30978                                                                                                                                                                                                                                                  |
|                    | turner syndrome                                 | 4307885                                                                                                                                                                                                                                                |
|                    | hemophilia                                      | 4236898                                                                                                                                                                                                                                                |

|                                           |                                               |                                                                                       |
|-------------------------------------------|-----------------------------------------------|---------------------------------------------------------------------------------------|
| condition<br>associated with<br>paralysis | cerebellar stroke<br>syndrome                 | 4111711                                                                               |
|                                           | cord injury                                   | 4226266, 4235863                                                                      |
|                                           | multiple sclerosis                            | 374919                                                                                |
|                                           | paraplegia                                    | 192606                                                                                |
|                                           | tetraplegia                                   | 374914                                                                                |
| etc                                       | amenorrhea                                    | 443800, 4230947                                                                       |
|                                           | dementia                                      | 4182210, 4314734, 374888, 4046090, 379778, 4218017, 4277444, 4220313, 4278830, 443605 |
|                                           | anorexia nervosa                              | 436675, 4333683                                                                       |
|                                           | chronic obstructive<br>lung disease           | 255573                                                                                |
|                                           | congestive heart<br>failure                   | 319835, 314378                                                                        |
|                                           | infectious disease<br>associated with<br>AIDS | 40493262                                                                              |
|                                           | epilepsy                                      | 4101747                                                                               |
|                                           | sarcoidosis                                   | 438688                                                                                |
|                                           | major depression                              | 435220                                                                                |

---

# Supplement 2. Subgroup analysis for the risk of IBS treatment on osteoporosis.

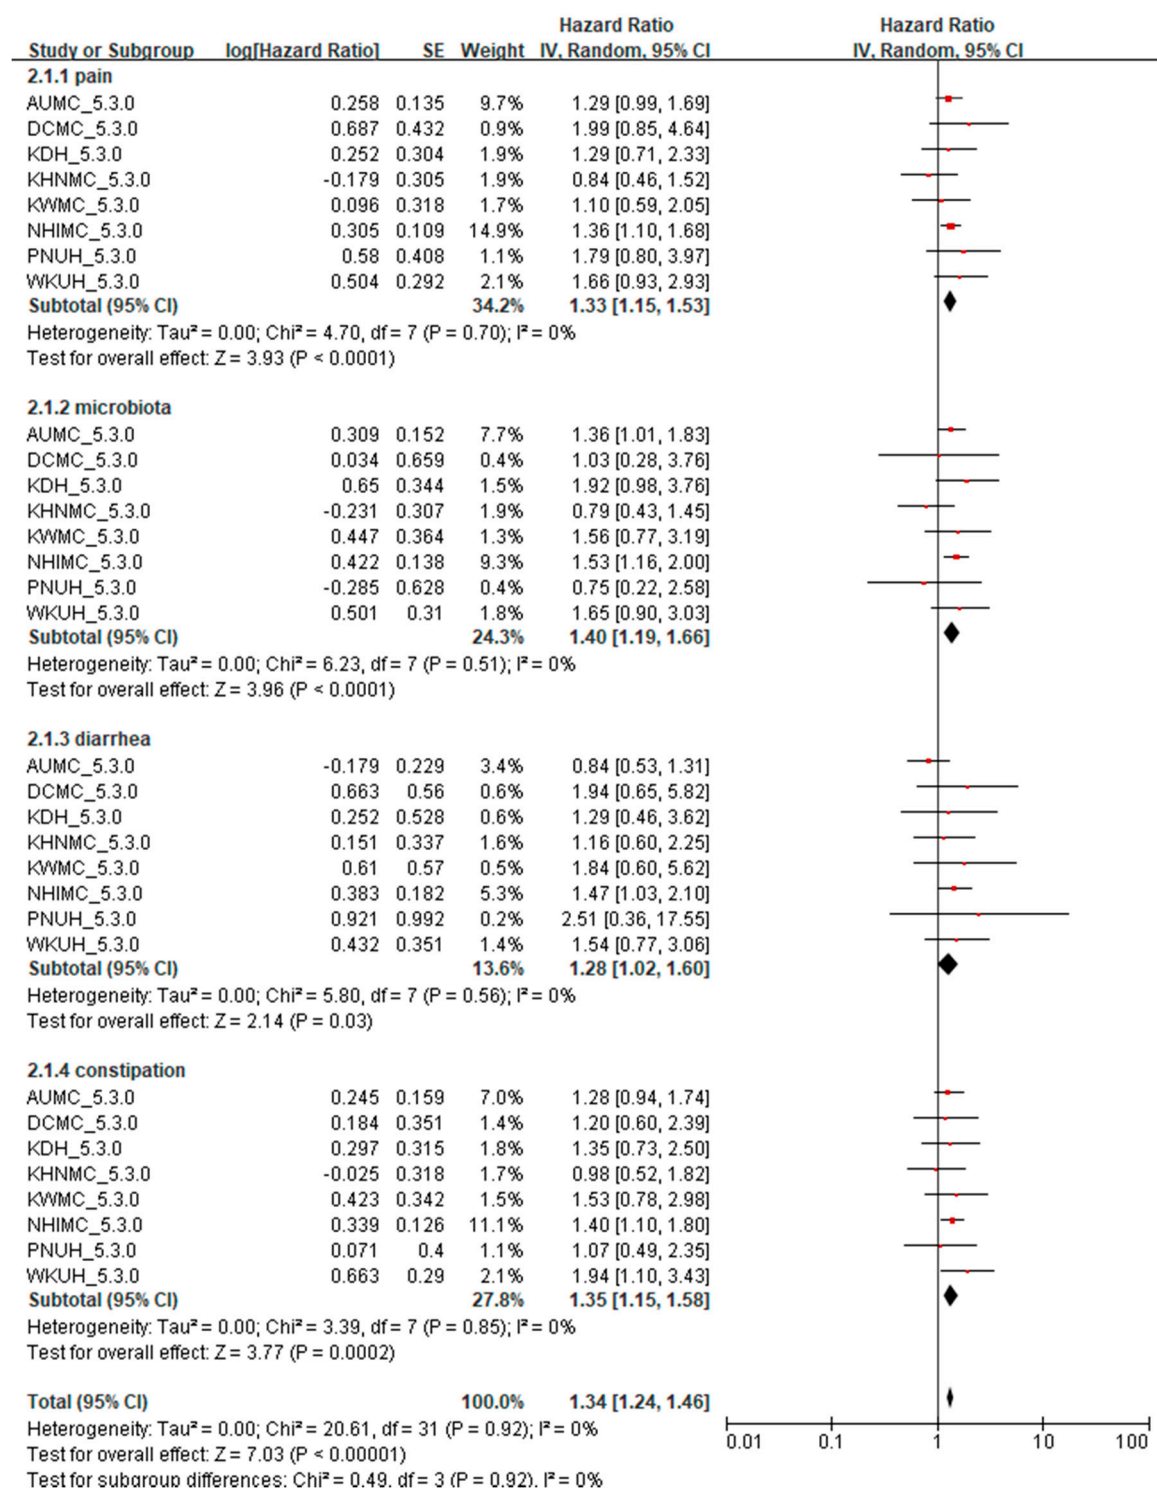

### Supplement 3. Subgroup analysis for the risk of IBS treatment on osteoporotic fracture.

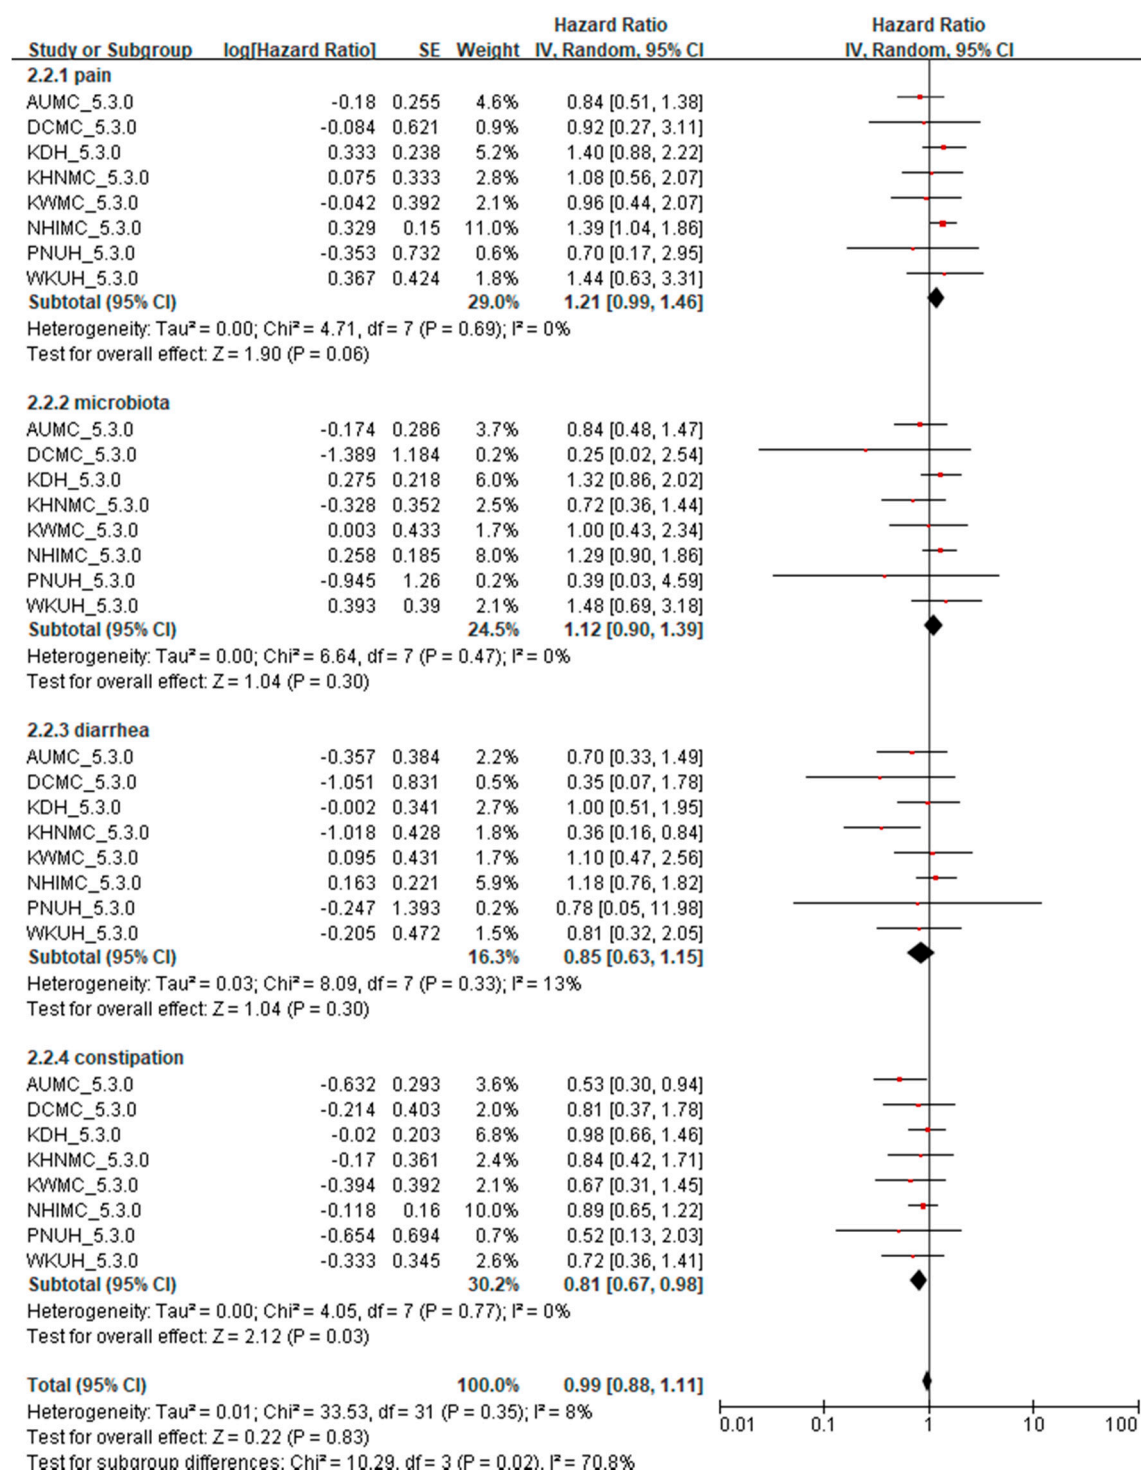

Supplement 4. The number of patients who were prescribed IBS treatment drugs.

| Prescribed medications IBS |                                  | IBS      |       | Non-IBS  |         | p-value |        |
|----------------------------|----------------------------------|----------|-------|----------|---------|---------|--------|
|                            |                                  | Patients | %     | Patients | %       |         |        |
| Pain                       | Amitriptyline                    | 174      | 0.62  | 5,228    | 0.83    | <0.001  |        |
|                            | Butylscopolamine                 | 1,770    | 6.26  | 14,832   | 2.36    | <0.001  |        |
|                            | Cimetidine                       | 2,408    | 8.52  | 42,455   | 6.77    | <0.001  |        |
|                            | Escitalopram                     | 28       | 0.10  | 2,024    | 0.32    | <0.001  |        |
|                            | Fluoxetine                       | 0        | 0.00  | 92       | 0.01    | <0.001  |        |
|                            | Imipramine                       | 0        | 0.00  | 160      | 0.03    | <0.001  |        |
|                            | Mebeverine                       | 40       | 0.14  | 11       | 0.00    | <0.001  |        |
|                            | Octylonium                       | 1,270    | 4.49  | 750      | 0.12    | <0.001  |        |
|                            | Paroxetine                       | 5        | 0.02  | 209      | 0.03    | 0.058   |        |
|                            | Pinaverium                       | 2,512    | 8.88  | 1,217    | 0.19    | <0.001  |        |
|                            | Sum of patients for pain         | 8,207    | 29.03 | 66,978   | 10.68   | <0.001  |        |
| Microbiota                 | Bacillus subtilis                | 2,294    | 8.11  | 15,417   | 2.46    | <0.001  |        |
|                            | Lactobacillus Acidophilus        | 994      | 3.52  | 7,214    | 1.15    | <0.001  |        |
|                            | Lactobacillus casei Rhamnosus    | 782      | 2.77  | 435      | 0.07    | <0.001  |        |
|                            | Lactobacillus Rhamnosus r0011    | 300      | 1.06  | 1,571    | 0.25    | <0.001  |        |
|                            | Rifaximin                        | 330      | 1.17  | 53       | 0.01    | <0.001  |        |
|                            | Saccharomyces Boulardii          | 3,612    | 12.78 | 6,032    | 0.96    | <0.001  |        |
|                            | Sum of patients for microbiota   | 8,312    | 29.40 | 30,722   | 4.90    | <0.001  |        |
| Diarrhea                   | Loperamide                       | 460      | 1.63  | 688      | 0.11    | <0.001  |        |
|                            | Nortriptyline                    | 95       | 0.34  | 1,612    | 0.26    | 0.024   |        |
|                            | Ondansetron                      | 4        | 0.01  | 789      | 0.13    | <0.001  |        |
|                            | Palonosetron                     | 5        | 0.02  | 325      | 0.05    | <0.001  |        |
|                            | Tianeptine                       | 822      | 2.91  | 1,410    | 0.22    | <0.001  |        |
|                            | Sum of patients for diarrhea     | 1,386    | 4.90  | 4,824    | 0.77    | <0.001  |        |
| Constipation               | Calcium polycarbophil            | 1,643    | 5.81  | 1,578    | 0.25    | <0.001  |        |
|                            | Carboxymethylcellulose           | 8        | 0.03  | 1,277    | 0.20    | <0.001  |        |
|                            | Cagnesium oxide                  | 751      | 2.66  | 5,092    | 0.81    | <0.001  |        |
|                            | Polyethylene glycol 3350         | 3,330    | 11.78 | 6,933    | 1.11    | <0.001  |        |
|                            | Pyridostigmine                   | 77       | 0.27  | 3,105    | 0.50    | <0.001  |        |
|                            | Tegaserod                        | 462      | 1.63  | 15       | 0.00    | <0.001  |        |
|                            | Sum of patients for constipation | 6,271    | 22.18 | 18,000   | 2.87    | <0.001  |        |
| Total                      | 28,273                           | 24,176   | 85.51 | 627,171  | 120,524 | 19.22   | <0.001 |

Total information (in red) may have been overestimated because one patient has been prescribed more than one medication.



# Supplement 5. Forest plot of meta-analysis who taken IBS treatment.

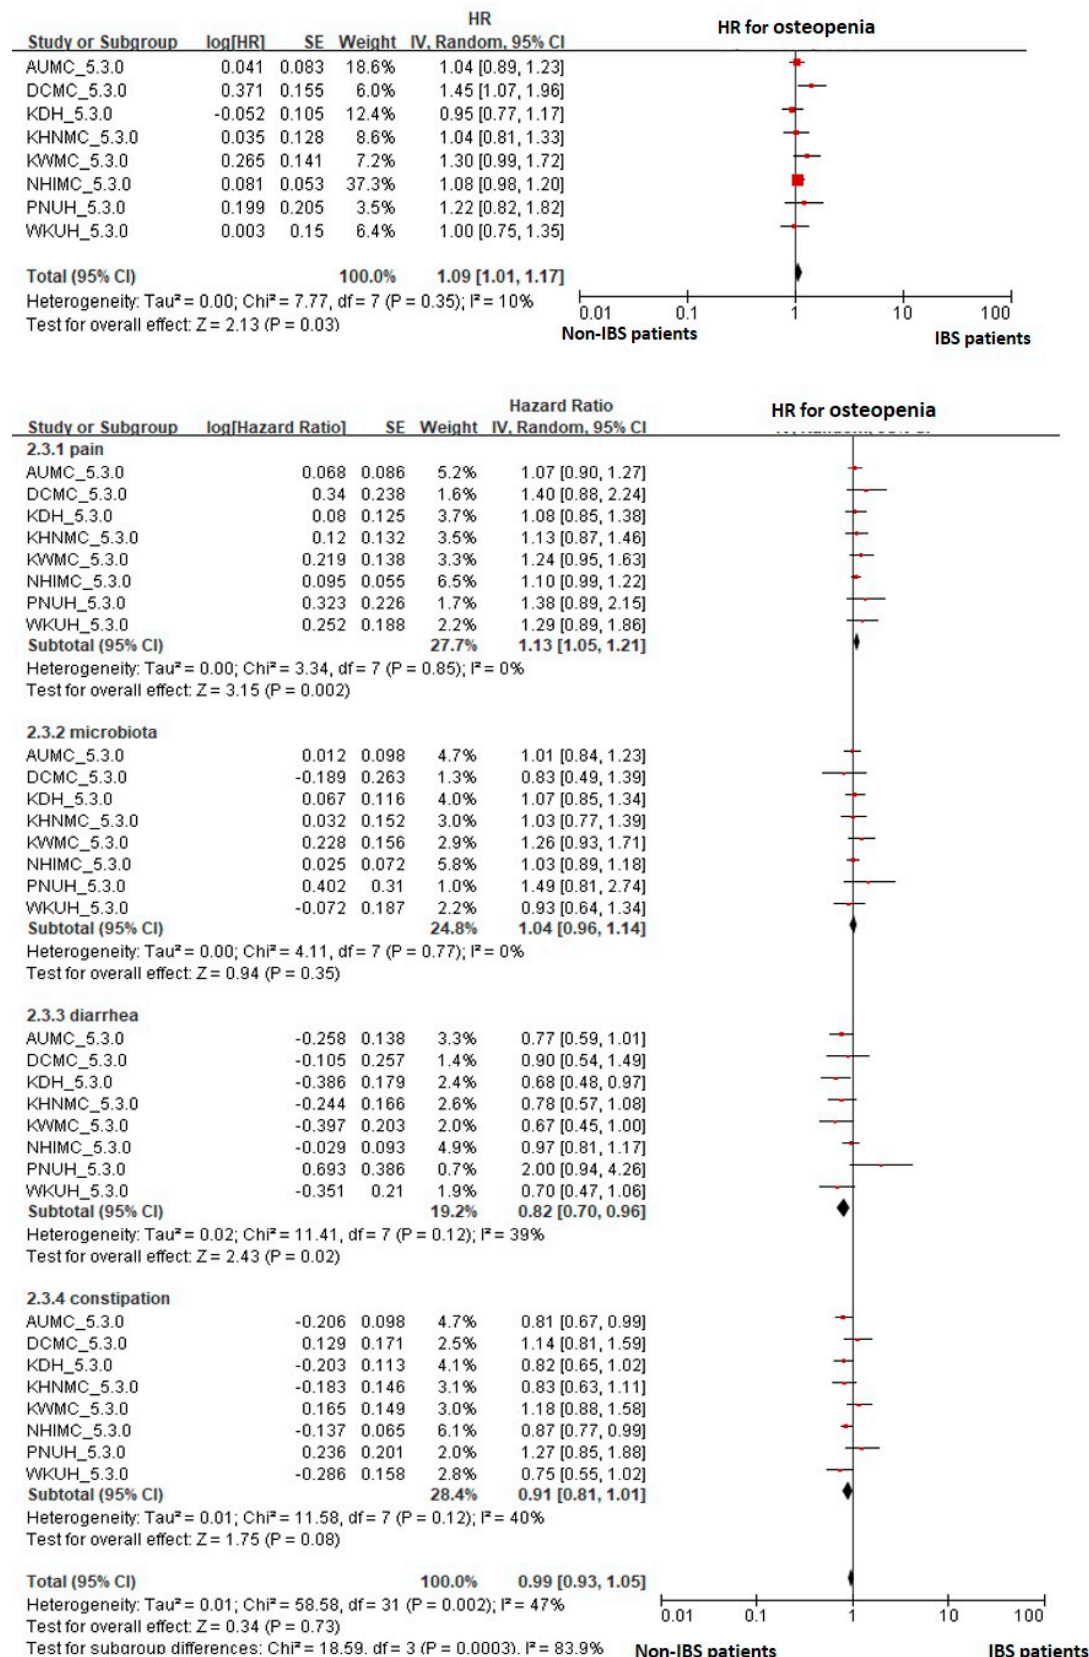

Supplement: s1 [file s1]
